# Supplementary material for: SOX14 hypermethylation as a tumour biomarker in cervical cancer
Source: PubMed Central journal article supplement (PMC8185922; doi:10.1186/s12885-021-08406-2), 2021-06-07

sample 1  
sample 2  
sample 3  
sample 4  
sample 5  
sample 6  
sample 7  
sample 8  
sample 9  
sample 10  
sample 11  
sample 12  
sample 13  
sample 14  
sample 15  
sample 16  
sample 17  
sample 18  
sample 19  
sample 20  
sample 21  
sample 22  
sample 23  
sample 24  
sample 25  
sample 26  
sample 27  
sample 28  
sample 29  
Marker

sample 30  
sample 31  
sample 32  
sample 33  
sample 34  
sample 35  
sample 36  
sample 37  
sample 38

No items

H2O  
Marker

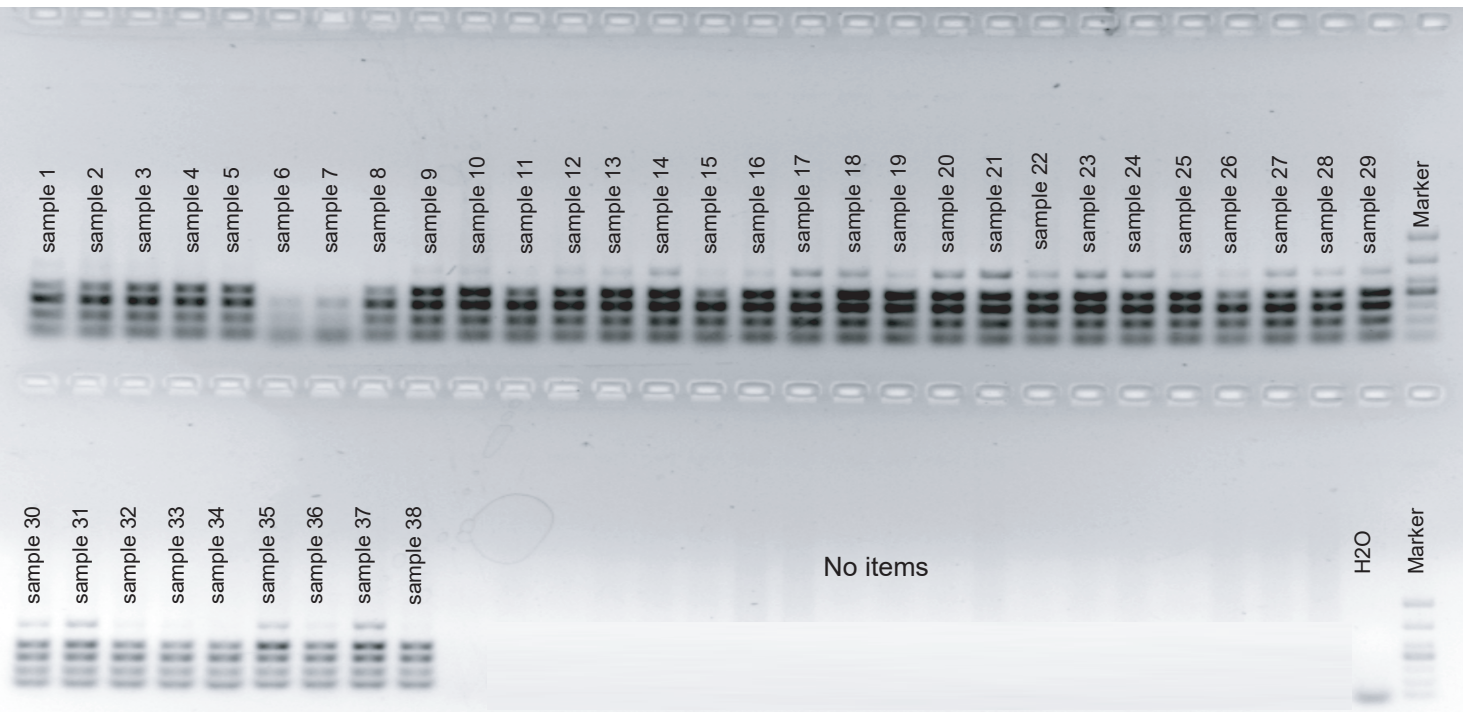

Supplement: 12885_2021_8406_MOESM2_ESM.pdf [file 12885_2021_8406_MOESM2_ESM.pdf]
