# Supplementary material for: SOX14 hypermethylation as a tumour biomarker in cervical cancer
Source: PubMed Central journal article supplement (PMC8185922; doi:10.1186/s12885-021-08406-2), 2021-06-07
Supplement: 12885_2021_8406_MOESM4_ESM.pdf [file 12885_2021_8406_MOESM4_ESM.pdf]

A

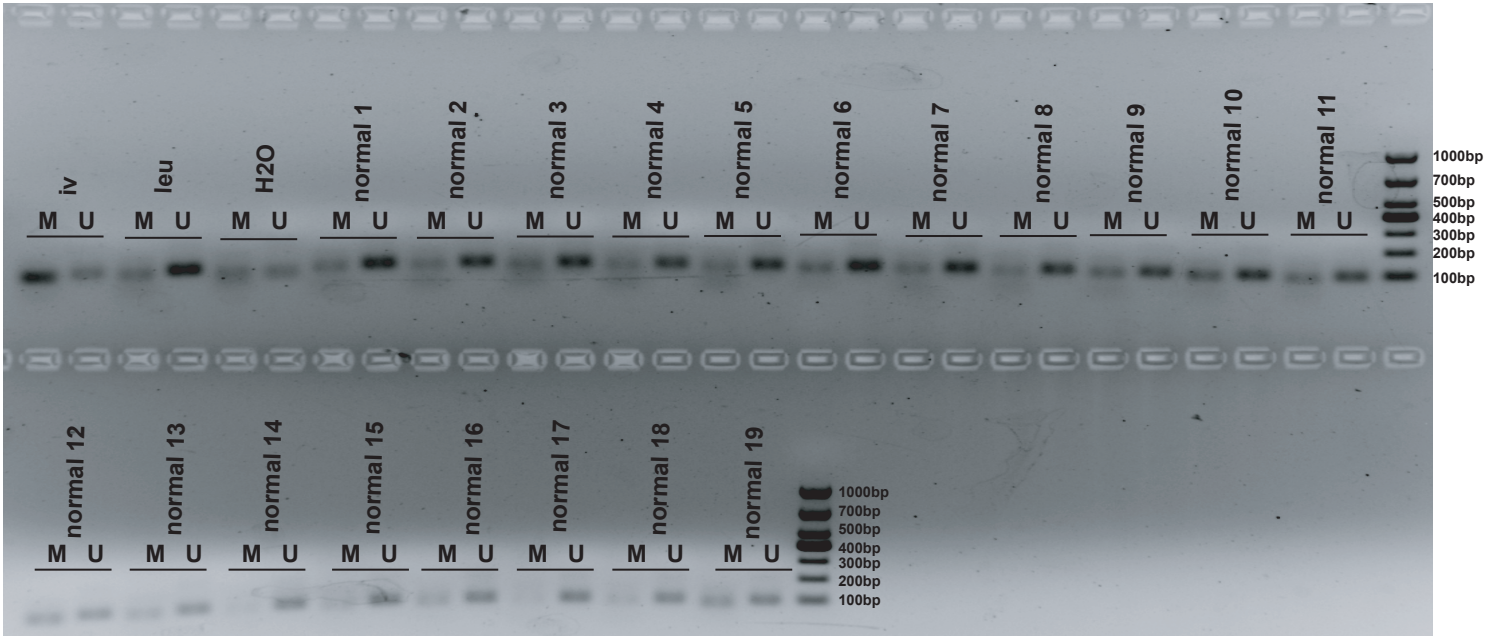

Normal

B

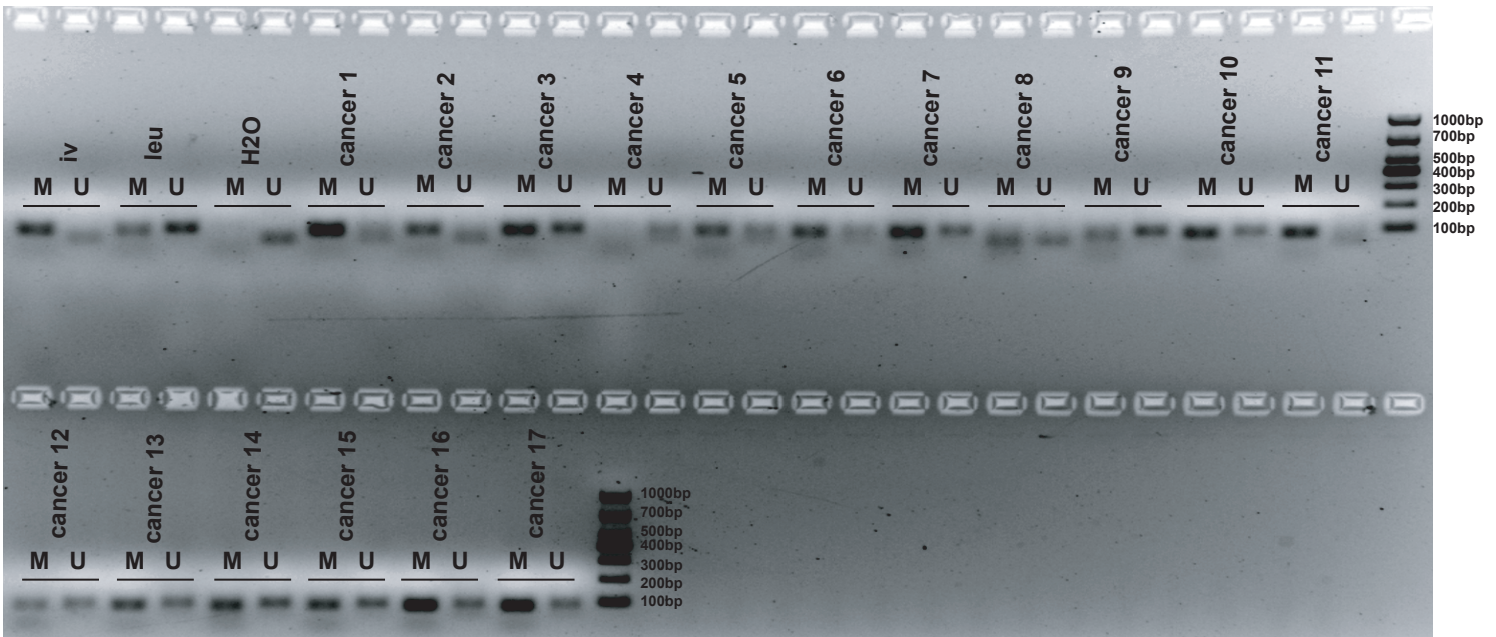

Cancer
